# Supplementary material for: Interaction between Pharmaceutical Drugs and Polymer-Coated Fe3O4 Magnetic Nanoparticles with Langmuir Monolayers as Cellular Membrane Models
Source: MDPI journal article supplement (doi:10.3390/pharmaceutics15020311), 2023-01-17
Supplement: s1 [file s1]

# Interaction between Pharmaceutical Drugs and Polymer-Coated Fe<sub>3</sub>O<sub>4</sub> Magnetic Nanoparticles with Langmuir Monolayers as Cellular Membrane Models

Sara Natalia Moya Betancourt <sup>1,2</sup>, Candelaria Inés Cámara <sup>1,2</sup> and Julieta Soledad Riva <sup>1,2,\*</sup>

<sup>1</sup> Consejo Nacional de Investigaciones Científicas y Técnicas (CONICET). Instituto de Fisicoquímica y Química Inorgánica de Córdoba (INFIQC) 5000 Córdoba, Argentina

<sup>2</sup> Departamento de Fisicoquímica. Facultad de Ciencias Químicas, Universidad Nacional de Córdoba. Haya de la Torre y Medina Allende, Ciudad Universitaria, 5000 Córdoba, Argentina

\* Correspondence: Julieta.riva@unc.edu.ar

## Supporting Information

### S1. Results

#### S1.1. Elastic modulus for MNPs:DSPA mixtures monolayer containing HTFPZ<sup>+</sup> or DCFN<sup>-</sup> in the subphase

The changes in  $C_s^{-1}$  of DSPA monolayers at different MNPs volume for mixed monolayer in presence of HTFPZ<sup>+</sup> or DCFN<sup>-</sup> in the subphase are shown in Figures S1 and S2, respectively. In presence of increasing amount of MNPs, the of  $C_s^{-1}$  values became progressively smaller. As the collapse pressure decrease in the isotherms, also the surface pressure of  $C_s^{-1}$  decrease.

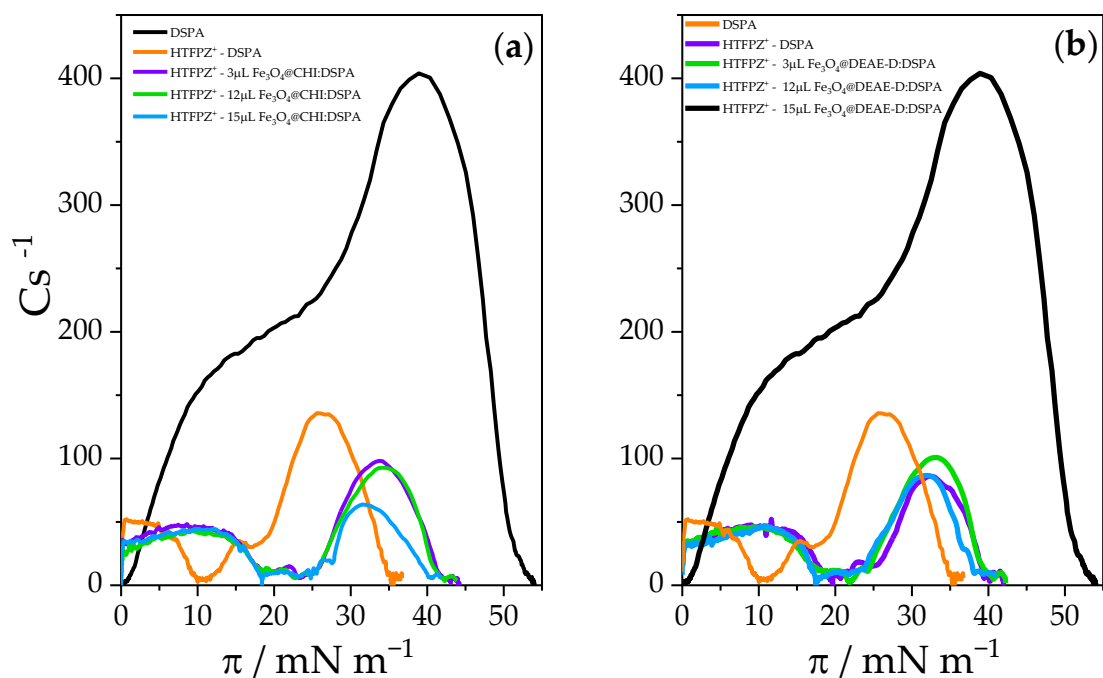

**Figure S1.**  $CS^{-1}$  as a function of pressure ( $\pi$ ) for (a)  $\text{Fe}_3\text{O}_4@CHI:DSPA$  and (b)  $\text{Fe}_3\text{O}_4@DEAE-D:DSPA$ , calculated from  $\pi$ -A isotherms using Equation (1). Subphase composition: HTFPZ<sup>+</sup> in LiCl 10 mM and LiCl 10 mM for black line.

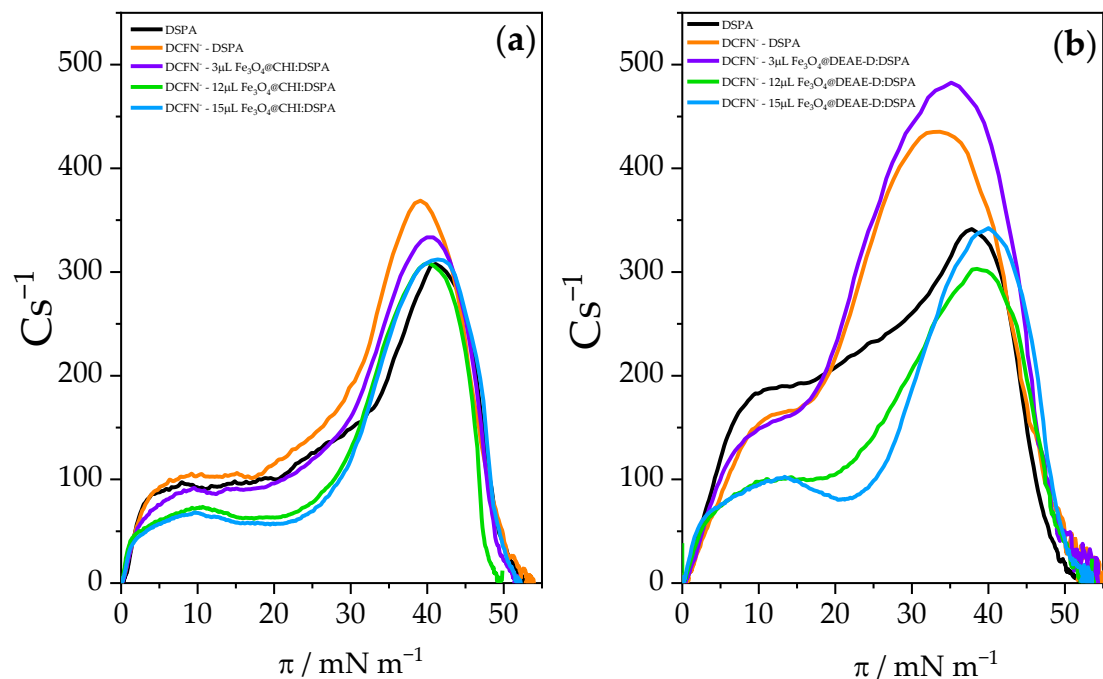

**Figure S2.**  $CS^{-1}$  as a function of pressure ( $\pi$ ) for (a)  $\text{Fe}_3\text{O}_4@CHI:DSPA$  and (b)  $\text{Fe}_3\text{O}_4@DEAE-D:DSPA$ , calculated from  $\pi$ -A isotherms using Eq. (1). Subphase composition: DCFN<sup>-</sup> in LiCl 10 mM and LiCl 10 mM for black line.
